# Supplementary material for: Eurythmy Therapy in clinical studies: a systematic literature review
Source: Springer Nature journal article supplement (doi:10.1186/1472-6882-8-8), 2008-03-31
Supplement: 12906_2007_167_MOESM1_ESM.pdf [file 12906_2007_167_MOESM1_ESM.pdf]

# Effect size

-1 -0.5 0 0.5 1 1.5 2 2.5 3

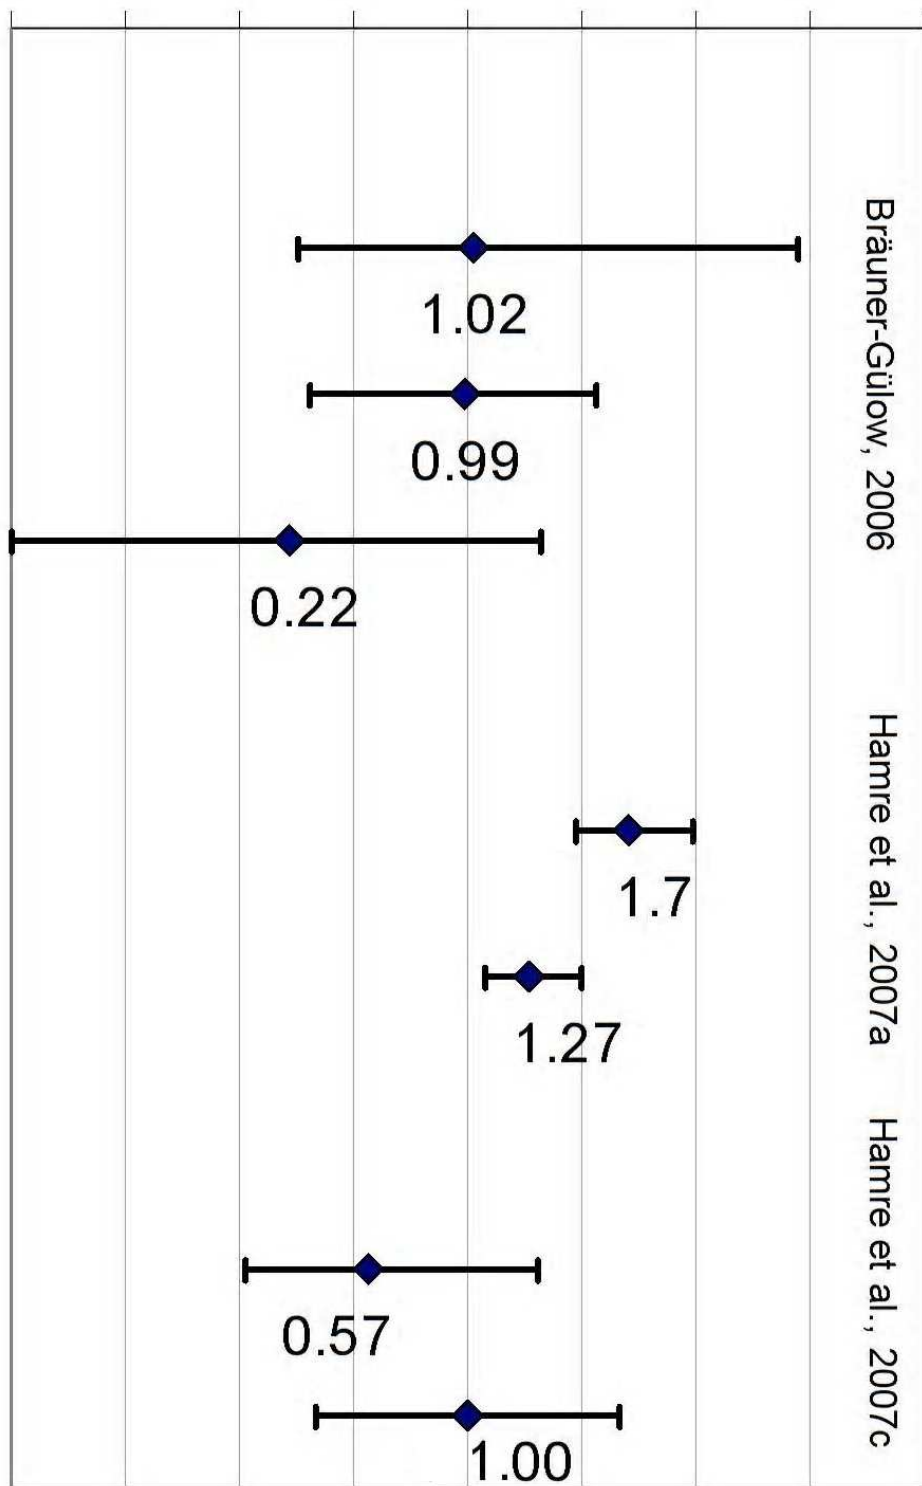

BMI 10-13 years

BMI 14-16 years

BMI 17-19 years

disease score

symptom score

symptom score (CM)

symptom score (AM)
